# Supplementary material for: Visuomotor strategies for object approach and aversion in Drosophila melanogaster
Source: Oxford University Press journal article supplement (doi:10.1242/jeb.193730), 2018-01-01
Supplement: jeb193730supp.pdf [file jeb193730supp.pdf]

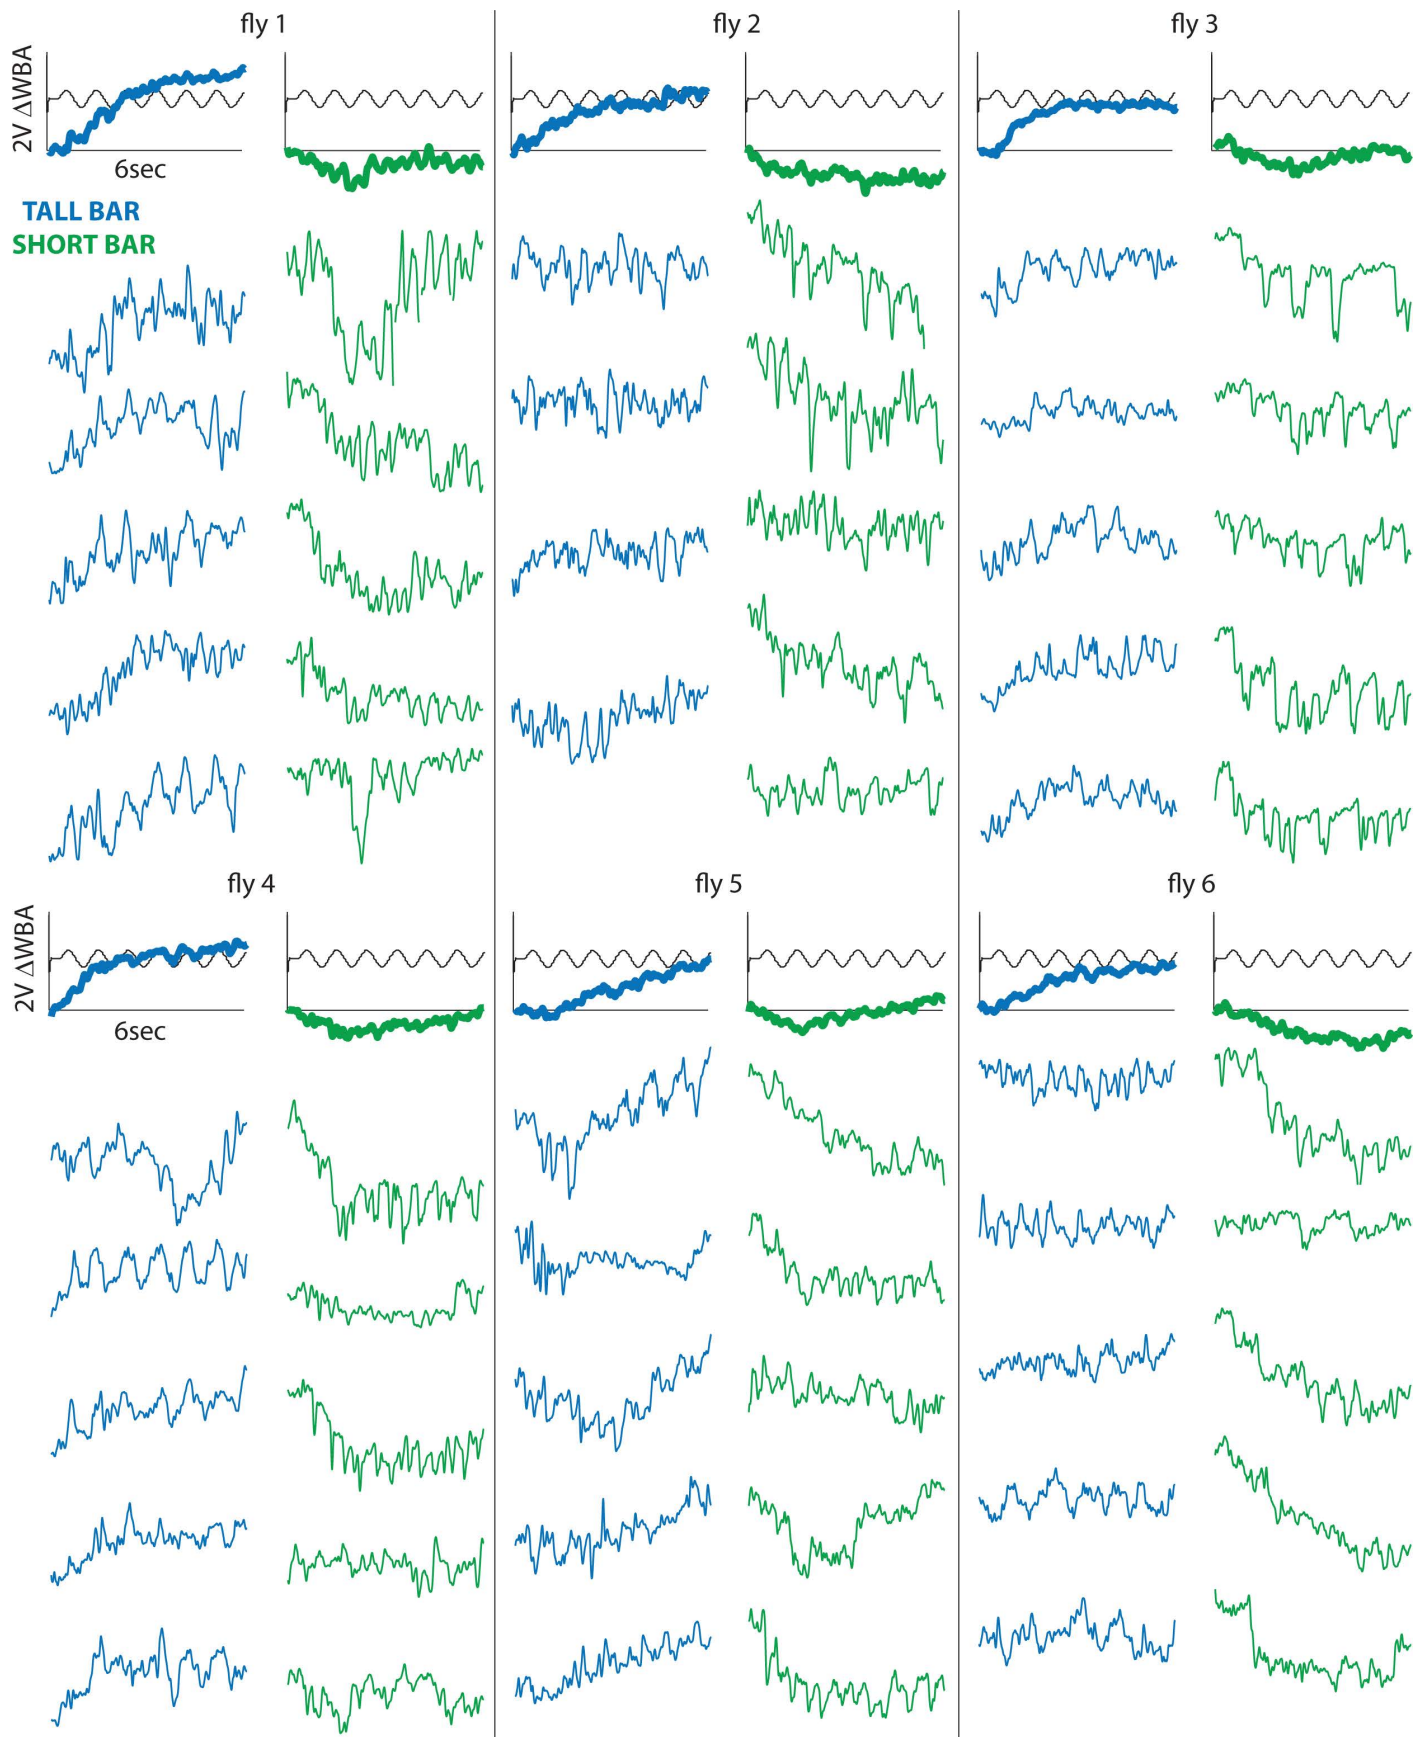

**Figure S1.** Raw data traces for a subset of tall (blue) and short (green) motion-defined bar trials. The open-loop stimulus oscillated at 1 Hz and moved 22.5° in each direction from its starting position at  $\pm 45^\circ$  from visual midline (angular speed =  $90^\circ \text{s}^{-1}$ ). Tall bar and short bar height were 120 and 30°, respectively, and width was kept constant at 30°. For each fly, we show the average response for an object for 12 trials on the fly's right (thick line), in addition to a subset of raw traces (thin lines).

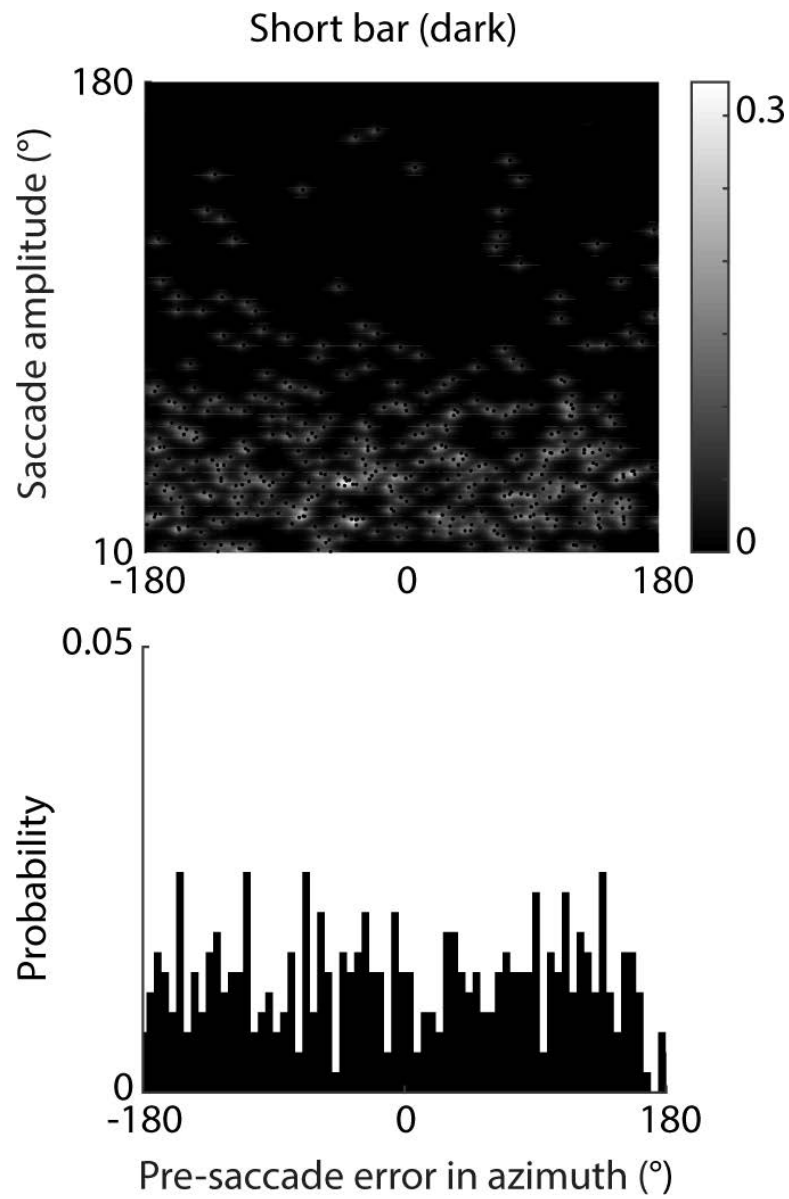

**Figure S2.** Top: Colormap of pre-saccade error in azimuth vs. saccade amplitude for a short, dark bar.  $0^\circ$  is the fly's visual midline. Bottom: Probability histogram of pre-saccade error angles.  $n = 5$  animals, 80 trials total.
